# Supplementary material
Source: ML conference proceedings conference paper supplement (https://aclanthology.org/2026.semeval-1.221)

### English-only

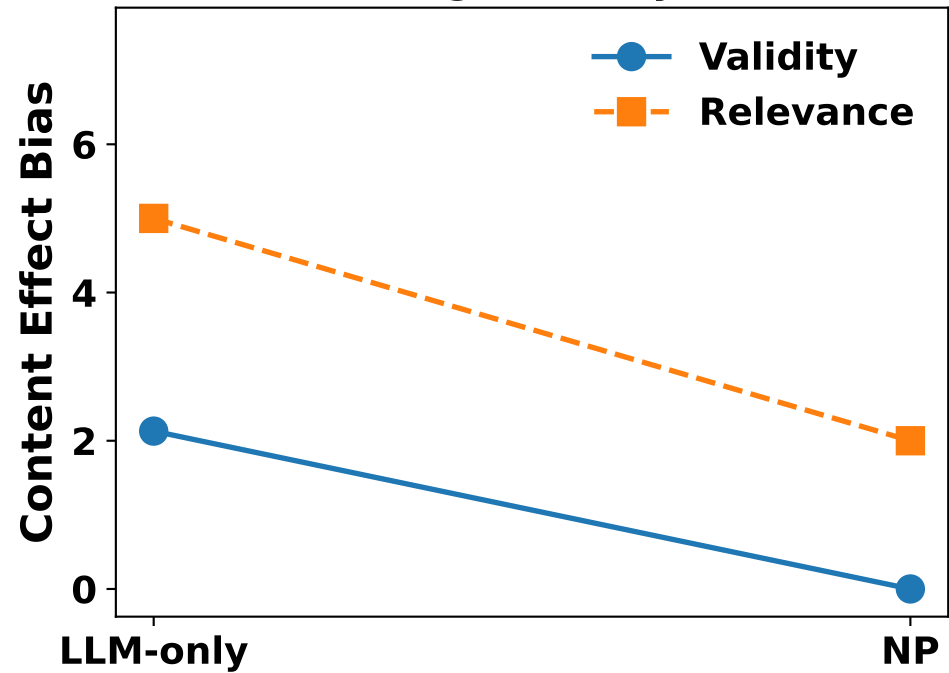

### Multilingual

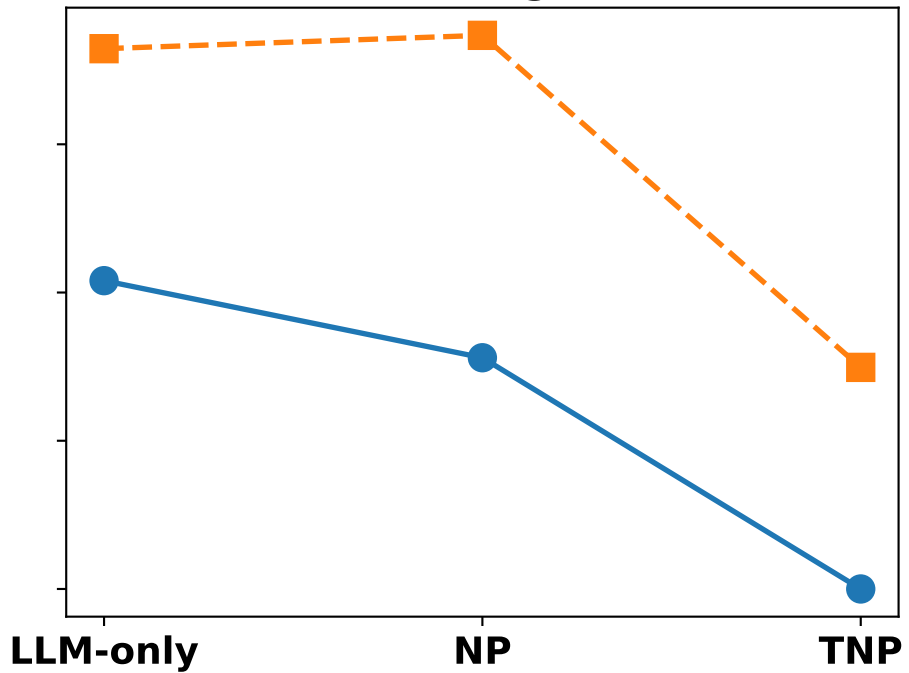

Supplement: SupplementaryMaterial [file content_effect_bias_subplots.pdf › latex/images/content_effect_bias_subplots.pdf]

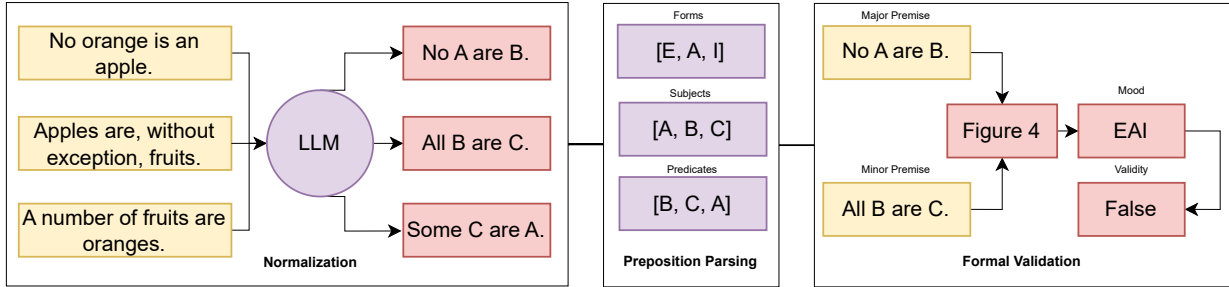

Supplement: SupplementaryMaterial [file flow_of_the_proposed_system.drawio.pdf › latex/images/flow_of_the_proposed_system.drawio.pdf]
